# Supplementary material
Source: publisher figshare collection journal article supplement (https://tandf.figshare.com/ndownloader/files/12807746)
Supplement: Supplementary file 1 [file 12807746]

# Supplement

Table S1: Components and development factors of urban transformative capacity (cf. Wolfram, 2016b)

| **Capacity component / development factors** |
| --- |
| **C1 Inclusive and multiform urban governance** |
| C1.1 Participation and inclusiveness |
| - Citizens and civil society organizations, as well as private businesses and their representations, participate directly in the deliberation of actions with state actors (government, administration). - Formerly excluded stakeholders are involved actively and supported to enable their contribution. |
| C1.2 Diverse governance modes and network forms |
| - There is diversity of formal and informal actor networks and governance modes. - There is diversity of centralized and decentralized actor networks and governance modes (top-down/bottom-up; hierarchy/market/negotiation). - Governance helps to build social capital (trusted actor relations). - Governance helps to build political capital (mobilization and support). - Overall actor network density (number of ties between actors involved) and cohesion (alignment of their interests) are balanced and not extreme (very high/low). |
| C1.3 Sustained intermediaries and hybridization |
| - There are intermediaries positioned between societal stakeholders that bridge relevant gaps amid sectors (public, private and civil society), action domains (e.g. energy/transport/land use), and/or spatial scales. - Intermediaries have a stable financial and organizational basis. - There are key individuals acting as boundary spanners or knowledge brokers between sectors, action domains and scales. - Intermediaries effectively align different actor interests and help to create a shared discourse. |
| **C2 Transformative leadership** (in the public, private and civil society sectors) |
| - There is place-based and/or issue-driven leadership in various sectors, oriented at systemic change for sustainability. - Leadership embraces joint problem-solving, shared decision-making and open processes. - Leadership articulates visions, emphasizes values and inspires enthusiasm. - Leadership feeds local issues into regional/national/global arenas and processes. - Leadership translates global/national/regional issues into local arenas and processes. - There is political leadership and commitment to systemic change for sustainability. |
| **C3 Empowered and autonomous communities of practice** (place-based and/or issue-driven) |
| C3.1 Addressing social needs and motives |
| - Communities of practice (CoP) genuinely articulate social needs. - Social needs are analyzed and deficits in meeting them are identified. - Deficits in meeting social needs inform action priorities in public policy. |
| C3.2 Community empowerment and autonomy |
| - Conditions of citizen powerlessness and disempowerment are identified. - Stakeholder association and formation of CoP’s is actively supported. - CoP’s have access to resources they require to meet social needs (information, time, space, skills, tools, social networks, social organization, financing). - Actions are taken to enhance feelings of self-efficacy and self-determination of CoP. - The level of CoP autonomy is effectively being raised. |
| **C4 System(s) awareness and memory** |
| C4.1 Baseline analysis and system(s) awareness |
| - New knowledge of systemic relations between ways of thinking (cultures), organizing (structures) and doing (practices) is actively developed to understand deficits in meeting social needs. - Governance structures, institutions and stakeholder conflicts are subject to dedicated analysis. - Analysis aims to move from status description towards a systemic explanation, and ultimately anticipation, of (non-) change dynamics (barriers/drivers). - All knowledge about urban systems is open source and widely shared, helping to create collective self-awareness and memory. - Strategic knowledge management is carried out to enable transfers between different forms of knowledge (implicit/explicit; simple/complex; systemic/sectoral) and temporalities of knowledge (past, present, future). |
| C4.2 Recognition of path dependencies |
| - Stakeholders explicitly recognize different degrees of obduracy/changeability within current systems (e.g. concerning institutions, regulations, infrastructures, built environs, routines, values). |

| **C5 Urban sustainability foresight** | |
| --- | --- |
| C5.1 Diversity and transdisciplinary co-production of knowledge | |
| - Knowledge about future un-/desirable urban developments is co-produced by actively involving diverse stakeholders from across sectors, action domains and scales - experts and laymen. - Science stakeholders are directly involved in knowledge co-production, including both technical and non-technical disciplines. | |
| C5.2 Collective vision for radical sustainability changes | |
| - Long-term change is conceived of as a ‘radical’ departurefrom the current state and development path of multiple urban SES and STS. - There is an explicit future vision, widely shared among stakeholders, reflecting the social needs identified and the existing diversity of values. - The vision has a strong motivating effect on stakeholders to contribute to its achievement. - The vision provides orientation for a wide range of urban strategies, programs and projects, allowing for flexibility and leaving options open. | |
| C5.3 Alternative scenarios and future pathways | |
| - Scenarios of future urban development are created that reflect co-evolutionary processes (mutual shaping of social, ecological, economic and technological dimensions). - Different scenarios illustrate alternative future pathways resulting from stakeholder choices and uncertainties. - Scenarios clarify options for action, their preconditions and implications for the relevant stakeholders, specifying objectives and critical milestones (thresholds). | |
| **C6 Diverse community-based experimentation with disruptive solutions** | |
| - Diverse experimentation is undertaken by place-based and/or issue-driven communities of practice. - Experiments are guided by a shared vision, and by preferred scenarios/pathways (if available). - Experiments deal with disruptive urban sustainability solutions, seeking to rebalance economic, social and ecological development. - Experiments are multi-dimensional, simultaneously addressing innovations in urban environments, cultures, institutions, governance, markets and technology. | |
| **C7 Innovation embedding and coupling** | |
| C7.1 Access to resources for capacity development | |
| Stakeholders share and/or enable access to basic resources for transformative capacity development (C1-6) incl. human-, knowledge-, time-, financial-, technical- and organizational resources. | |
| C7.2 Planning and mainstreaming transformative action | |
| - Options for innovation arising from foresight and/or experiments are integrated with possible actor coalitions to form 'systemic alternatives' (combinations of actors, institutions, resources, etc.). - Practical approaches for coalition building and decision making procedures that enable innovation embedding are developed systematically. - Stakeholder organizations, plans and/or programs are adjusted to remove innovation barriers and support transformative actions. - Priority transformative actions are further specified through concrete work plans (management, resources, timing). | |
| C7.3 Reflexive and supportive regulatory frameworks | |
| - Pertinent regulations are aligned with the vision and adjusted to remove innovation barriers and support transformative actions. - Pertinent regulations leave room for alternative solutions and context-specific interpretation and implementation. - Pertinent regulations enable to use wider resource streams for transformative action (financial, human, technical, organizational). | |
| **C8 Reflexivity and social learning** |  |
| - Reflexive monitoring is carried out on all dimensions of urban transformative capacity development (C1-7). - Participants in experiments have methodical and practical skills for enabling reflexivity (monitoring, assessment, evaluation). - Wider stakeholder and leadership reflexivity is enabled through diverse formal and informal interaction formats, providing room for critically questioning progress towards the vision. - Practical know-how for initiating and performing radical change for sustainability (i.e. transformational knowledge) is managed systematically. | |
| **C9 Working across human agency levels** | |
| - Capacity development (C1-8) involves multiple levels of agency in the public, private and civil society sectors, including I) individuals, H) households, G) social groups, O) organizations, N) networks (of individuals, groups, etc.) and S) society. | |
| **C10 Working across political-administrative levels and geographical scales** | |
| - Capacity development (C1-8) reflects interactions between relevant political-administrative levels and geographical scales in terms of the topics addressed and stakeholders involved, including A) inner-urban areas (site, block, neighborhood, borough, district) (U), urban territories (city and its metropolitan area) (R), regional territories (e.g. counties, provinces), N) national territories, G) inter- and transnational spaces. | |

Table S2: Case study city selection and balancing criteria for a ‘most different cases’ design

| **Criteria** | **Changwon** | **Gwangju** | **Seoul** |
| --- | --- | --- | --- |
| Size (inh.) 2015 | 1.047.488 | 1.466.143 | 9.631.482 |
| Political orientation (party of mayor in the last two/three consecutive legislation periods) | progressive/ conservative | progressive / progressive | conservative/ progressive |
| Political-administrative function (according to Korean law) | Specific city authority, 5 districts (created 2010) | Metropolitan city authority, 5 districts | Special city authority, 25 districts |
| Highest government function (according to Korean law) | Provincial capital | Autonomous city | National capital |
| Ex-ante assessment* of sustainability orientations in local policy (public website / urban master plan) | average / weak | strong / average | average / average |
| Identified as energy transition ‘good practice case’ (Delphi survey, n=43) | 11/43 | 13/43 | 21/43 |

*4-level scale: absent, weak, average, strong

Table S3: List of stakeholders selected for personal interviews and individual transformative capacity assessment

| **No.** | **Affiliation** | **Stakeholder group** |
| --- | --- | --- |
|  | **Changwon** |  |
| C1 | Changwon government, Department of Urban Planning | Local government |
| C2 | Changwon government, Urban regeneration division | Local government |
| C3 | Changwon government, Economic development division | Local government |
| C4 | Nurim maeul community | Civil society |
| C5 | Yongho-dong village community | Civil society |
| C6 | Kyeongnam solar energy coop | Business (social enterprise) |
| C7 | EM KOREA CO. ltd. | Business (industry) |
| C8 | Haeahn architecture | Business |
| C9 | Changwon urban regeneration center | Intermediary (public) |
| C10 | Kyeongnam information society | NGO (local) |
| C11 | Bonggok Institute For Lifelong Education | NGO (local), intermediary |
| C12 | Gihl Lab | NGO (local), intermediary |
| C13 | Kyeongnam University, Division of Architecture | Research |
| C14 | Changwon University, Architecture Department | Research |
| C15 | Kyeongnam University, Department of Social Welfare | Research |
|  | **Gwangju** |  |
| G1 | Gwangju government, urban regeneration department | Local government |
| G2 | Gwangju government, community building department | Local government |
| G3 | Gwangju government, energy department | Local government |
| G4 | Jeollanam do government, Regional Planning Division | Regional government |
| G5 | Sinsiwa guesthouse | Civil society |
| G6 | Sihwa Munhwa village studio | Civil society |
| G7 | Daeinart Market Community | Civil society |
| G8 | Dong Myong Engineering and Consulting (DMEC) | Business |
| G9 | Elephant coop | Business (social enterprise) |
| G10 | Korea Electric Power Corporation (KEPCO) | Business (industry) |
| G11 | International Climate & Environment Center | NGO (local), intermediary |
| G12 | Gwangju NGO Center | NGO (local), intermediary |
| G13 | Green Gwangju 21 | Intermediary (public) |
| G14 | Gwangju University, urban planning department | Research |
| G15 | Gwangju development institute, energy & environment dep. | Research |
| G16 | Gwangju development institute, community building dep. | Research |
|  | **Seoul** |  |
| S1 | Seoul Metropolitan Govmt. (SMG), urban regeneration div. | Local government |
| S2 | SMG, climate and environment bureau | Local government |
| S3 | SMG, citizen energy cooperation divison | Local government |
| S4 | SMG, community building division | Local government |
| S5 | Seongdaegol People, Dongjak-gu | Civil society |
| S6 | Energy self-reliant village community, Songpa-gu | Civil Society |
| S7 | Solidarity for Urban Areas | NGO (local) |
| S8 | Transition City Sinchon (Seoul) | NGO (local) |
| S9 | Korean Federation for Environmental Movements | NGO (national) |
| S10 | ICLEI Local Governments for Sustainability, Korea | NGO (national) |
| S11 | Seoul Village Community Support Center | Intermediary (public) |
| S12 | Seoul Social Enterprise Support Center | Intermediary (public) |
| S13 | Korea Electric Power Corporation (KEPCO) | Business (industry) |
| S14 | Toadhousing company | Business |
| S15 | Root Energy | Business (social enterprise) |
| S16 | Sungmisan alternative school | Business (social enterprise) |
| S17 | Yonsei University, Department of Urban Planning | Research |
| S18 | Seoul Institute, Dept. of Urban Planning and Design Research | Research |

Figure S1: Location and scale of the selected case study cities in the South Korean urban context (greyscale indicates urbanization rate in %)

**
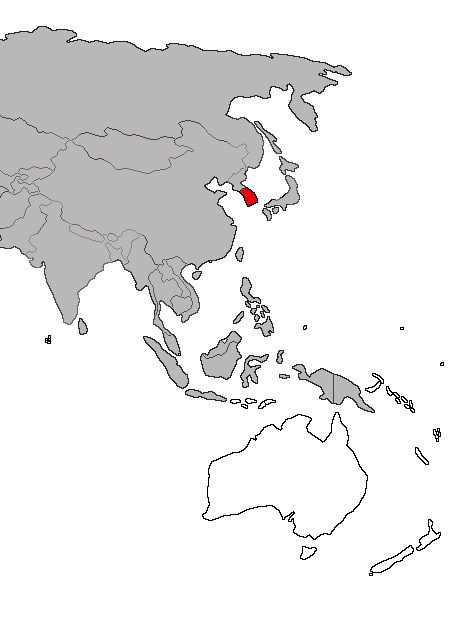
**
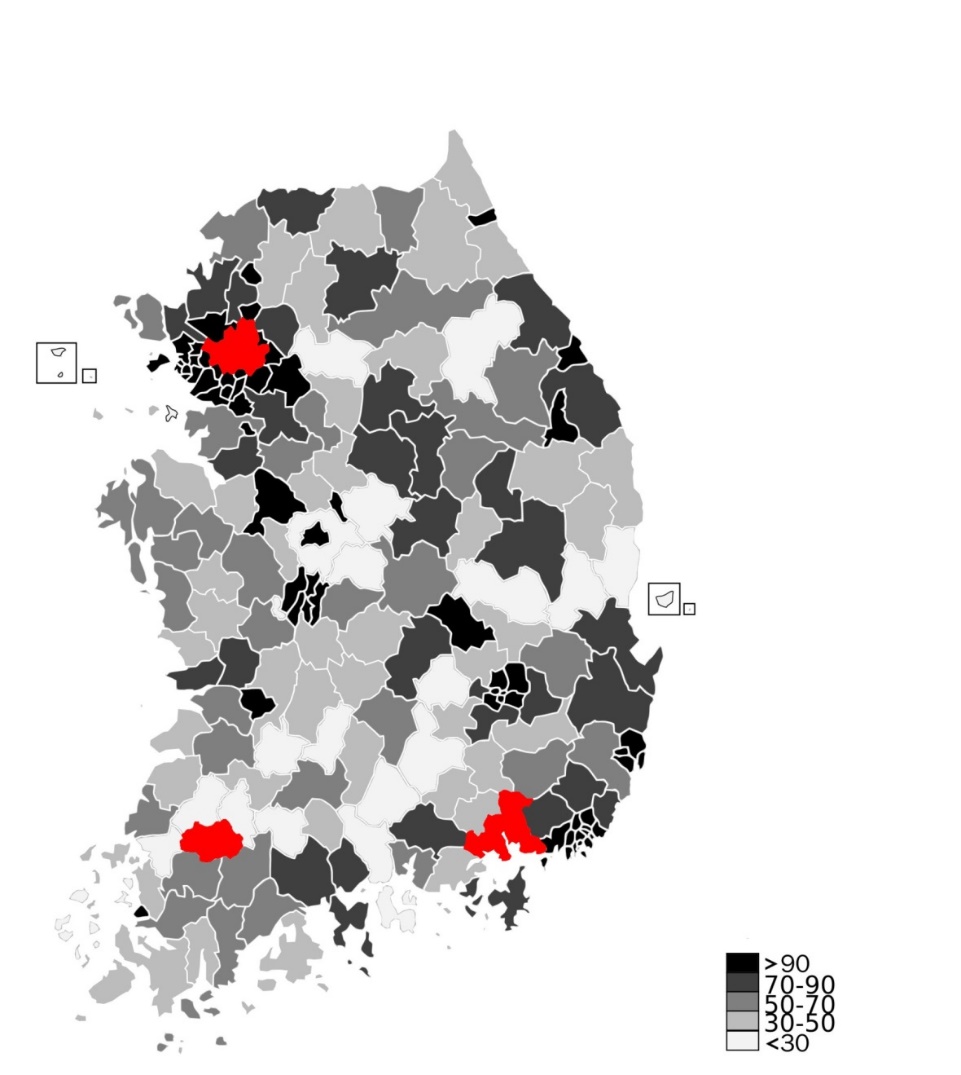


South Korea

Gwangju

Changwon

Seoul
